# Supplementary material for: Knockout of SORBS2 Protein Disrupts the Structural Integrity of Intercalated Disc and Manifests Features of Arrhythmogenic Cardiomyopathy
Source: PubMed Central journal article supplement — J Am Heart Assoc. 2020 Sep 18;9(17):e017055. doi: 10.1161/JAHA.119.017055 (PMC7660791; doi:10.1161/jaha.119.017055), 2020-09-18
Supplement: JAH3-9-e017055-s001.pdf [file JAH3-9-e017055-s001.pdf]

# **SUPPLEMENTAL MATERIAL**

**Table S1. Echocardiography indices in the *sorbs2<sup>es8/-</sup>* heterozygous mice compared to WT controls at 4 weeks post-doxorubicin injection (20 mg/kg)**

|                 | WT siblings | <i>Sorbs2<sup>es8/-</sup></i> | P value |
|-----------------|-------------|-------------------------------|---------|
| Mice number (n) | 15          | 14                            |         |
| HR (bpm)        | 356±63      | 350±74                        | 0.829   |
| IVSd (mm)       | 0.7±0.1     | 0.7±0.1                       | 0.364   |
| LVIDd (mm)      | 3.9±0.3     | 4.0±0.4                       | 0.333   |
| LVPWd (mm)      | 0.8±0.3     | 0.7±0.1                       | 0.223   |
| IVSs (mm)       | 1.1±0.1     | 1.1±0.1                       | 0.518   |
| LVIDs (mm)      | 2.8±0.3     | 2.9±0.4                       | 0.348   |
| LVPWs (mm)      | 1.1±0.1     | 1.1±0.1                       | 0.882   |
| LVEF (% Cube)   | 63.1±5.6    | 63.5±5.8                      | 0.843   |
| LVEF (% Teich)  | 61.7±5.6    | 61.9±5.8                      | 0.955   |
| LVFS (%)        | 28.4±3.7    | 28.7±3.8                      | 0.827   |
| LVd Mass (g)    | 0.7±0.0     | 0.7±0.0                       | 0.743   |
| LVs Mass (g)    | 0.7±0.0     | 0.7±0.0                       | 0.808   |

HR, heart rate; bpm, beats per minute; IVSd, Interventricular septum thickness at end-diastole; LVIDd, left ventricular internal dimension at end-diastole; LVPWd, left ventricular internal dimension at end-diastole; IVSs, Interventricular septum thickness at end-systole; LVIDs, Left ventricular internal dimension at end-systole; LVPWs, Left ventricular posterior wall thickness at end-diastole; LVEF, left ventricular ejection fraction; LVFS, left ventricular fractional shortening; LVd, left ventricular at end-diastole; LVs, left ventricular at end-systole. Unpaired two-tailed student's *t*-test.

**Table S2. Baselines of 59 ACM patients and 402 health control**

|                                                | Patients with ACM<br>(n=59) | Healthy Control<br>(n=402) | p-value |
|------------------------------------------------|-----------------------------|----------------------------|---------|
| Age, y                                         | 47.5 ± 13.7                 | 62.8 ± 11.2                | <0.001  |
| Male, n (%)                                    | 37 (62.7)                   | 265 (65.9)                 | 0.628   |
| Hypertension, n (%)                            | 19 (32.2)                   | 230 (57.2)                 | <0.001  |
| Diabetes, n (%)                                | 7 (11.9)                    | 75 (18.7)                  | 0.203   |
| Alcohol, n (%)                                 | 12 (20.3)                   | 91 (22.6)                  | 0.692   |
| LAI Dd, mm                                     | 41.3 ± 13.1                 | 33.4 ± 5.4                 | <0.001  |
| LVI Dd, mm                                     | 49.9 ± 10.2                 | 46.8 ± 4.9                 | 0.302   |
| RAI Dd, mm                                     | 47.1 ± 12.2                 | 32.5 ± 6.7                 | <0.001  |
| RVI Dd, mm                                     | 50.1 ± 11.2                 | 28.0 ± 5.2                 | <0.001  |
| Maximum LV wall thickness, mm                  | 9.7 ± 1.61                  | 9.2 ± 0.7                  | 0.421   |
| Left ventricular eject fraction, %             | 53.5 ± 14.2                 | 63.2 ± 7.6                 | <0.001  |
| Implantable cardioverter-defibrillators, n (%) | 15 (25.4)                   | 0 (0.0)                    | <0.001  |

LAI Dd, left atrial internal dimension at -diastole; LVI Dd, left ventricular internal dimension at -diastole; RAI Dd, right atrial internal dimension at diastole; RVI Dd, right ventricular internal dimension at diastole. Unpaired two-tailed student's *t*-test.

**Table S3. Diagnosis of the ACM patients carrying potential pathogenic variants in *SORBS2* gene according to 2019 HRS expert consensus statement**

| Genotype   | Global and/or Regional Dysfunction and Structural Alterations | Tissue Characterization of Wall | Repolarization Abnormalities | Depolarization/Conduction Abnormalities | Arrhythmias | Family History |
|------------|---------------------------------------------------------------|---------------------------------|------------------------------|-----------------------------------------|-------------|----------------|
| c.679+1G>T | Major                                                         | NA                              | -                            | Minor                                   | Major       | NA             |
| c.869+1C>G | Major                                                         | NA                              | Major                        | Minor                                   | Major       | Major          |

NA, data not available

**Table S4. Clinical characteristics and genotypes of patients carrying potential pathogenic variants in the *SORBS2* gene**

| Gene          | Genotype   | Age<br>y | LAIDd<br>mm | LVIDd<br>mm | RAIDd<br>mm | RVIDd<br>mm | LVEF<br>% | Mutations for other<br>known ACM genes |
|---------------|------------|----------|-------------|-------------|-------------|-------------|-----------|----------------------------------------|
| <i>SORBS2</i> | c.679+1G>T | 43       | 32          | 50          | 33          | 45          | 68        | None                                   |
| <i>SORBS2</i> | c.869+1C>G | 27       | 29          | 42          | 47          | 49          | 66        | <i>PKP2</i> : c.2421C>A                |

RefSeq: *SORBS2*: NM\_001270771.1; LAIDd, left atrial internal dimension at diastole; LVIDd, left ventricular internal dimension at diastole; RAIDd, right atrial internal dimension at diastole; RVIDd, right ventricular internal dimension at diastole; LVEF, left ventricular ejection fraction. ARVC, arrhythmogenic right ventricle cardiomyopathy.

**Table S5. Sanger sequencing primers of coding regions of the *SORBS2* and *CTNNA3* gene**

| Name             | Forward                           | Reverse                             |
|------------------|-----------------------------------|-------------------------------------|
| SORBS2-E4        | 5'- AAGAGTGGGGCACAAATACAAAG-3'    | 5'- AAACAAGCACAAAACGTCTCCAT-3'      |
| SORBS2-E5        | 5'- AAACGTGAATAGTTATTAACACTCGC-3' | 5'- GGTGCATTCCATGATTACTAATTCT-3'    |
| SORBS2-E6E7      | 5'- GAAAGAGGCTGTAAGCAGTGGTC-3'    | 5'- TTGGCATGTTTGACATACCCA-3'        |
| SORBS2-E8        | 5'- AGACACAGGTGGAGACATGGTCT-3'    | 5'- TACTCTCATGTGATTGGAAGTCTTTTA-3'  |
| SORBS2-E9        | 5'- AGGAATGCACAAAGCCGTG-3'        | 5'- CTCTGTGTTACAGTTGGCATAAATATAC-3' |
| SORBS2-E10       | 5'- AACCGATGCAAAAAGACGAATG-3'     | 5'- GCAAAGAGTCAGAACATTTTATCACA-3'   |
| SORBS2-E11       | 5'- CCTTTTGTTATGCACGCTCTGA-3'     | 5'- TACGTTGCTTTTCTAACAAATTTCTG-3'   |
| SORBS2-E12       | 5'- TGGCAGGTGCACTGATTCTTC-3'      | 5'- CAAAGATTTACTGTAATCAGGGCTTA-3'   |
| SORBS2-E13       | 5'- AAATTGCTAATGGGTCTGAAATTC-3'   | 5'- CTCATGTGACTTTTGGAGCCAG-3'       |
| SORBS2-E14       | 5'- TAAGGGCCATTTAACAACATTGA-3'    | 5'- CCAAGTAGAAATCAGGTCGCAT-3'       |
| SORBS2-E15       | 5'- ATTCCAGACACTGTAGGTGAGAGC-3'   | 5'- GGTTTAGGAGTTACGCCATTGTC-3'      |
| SORBS2-E16-Part1 | 5'- GGGAGTGATGAGATGTTGGAATG-3'    | 5'- ACATTGAAGTCACCAGCGATGA-3'       |
| SORBS2-E16-Part2 | 5'- GTAAATCGAGTGTAGGAGGCCG-3'     | 5'- GAAGCTCCATGTGTGAACAATCA-3'      |
| SORBS2-E17       | 5'- GAGTTCGTTACTGGTTTGGGATA-3'    | 5'- TGTGTTGATAACGGTGTCTCTC-3'       |
| SORBS2-E18       | 5'- GATCCTACTGCAATGCTTATCTCTTA-3' | 5'- GTTTGATGATTCCCTGAGTTTTC-3'      |
| SORBS2-E19E20    | 5'- ACCAGCAGGGAACCGTGAC-3'        | 5'- CAAGGATCATTCTTATCTAATCGGAC-3'   |
| SORBS2-E21       | 5'- TTGTCAACCTAATAACCCGGTG-3'     | 5'- TCTGATGGCCTGAATGGACAT-3'        |
| SORBS2-E22       | 5'- CGTGCAAAGCCATACATCTTACA-3'    | 5'- ACATTTGACCTTGCTTATTTTGCT-3'     |
| SORBS2-E23       | 5'- GCCATCACAGCAAACCACG-3'        | 5'- ACAATTTTCATGGATATTCCTCGT-3'     |
| SORBS2-E24       | 5'- TTGGAAACCGTAAGGCATGA-3'       | 5'- CACTGCTTATTTTGTCTGCCTATG-3'     |
| CTNNA3-E2        | 5'-TTATTCTTCATTATTCATTTTTCCAC-3'  | 5'-TCCTCTGAGGGCTATGGTTGAT 3'        |
| CTNNA3-E3        | 5'-GCCTGGAGTGGGACTGAGC-3'         | 5'-TCTGGTCAACAGTAGGCTATTCGTA-3'     |
| CTNNA3-E4        | 5'-GTGAAGCCAAGATGCACTAGGAT-3'     | 5'-GGCAGCAATTTTACTAGATGTTCCCT-3'    |
| CTNNA3-E5        | 5'-TTAGAAGATAAGTTTCCTCAGACCCA-3'  | 5'-GAGGACTGAACAGGCTTCTCATG-3'       |
| CTNNA3-E6        | 5'-TGCTCTAAACGCCAACATGTG-3'       | 5'-ACATCTGCTCTACGGGGACCT-3'         |
| CTNNA3-E7        | 5'-CTAGAAATCCCAGGGTTGTTG-3'       | 5'-TGAACCAGCCGAGGCAGTA-3'           |
| CTNNA3-E8        | 5'-CTGATAAGGCACACATTCTTTCTCT-3'   | 5'-TCTTAAGTGAATGCTCATGAATCATA-3'    |
| CTNNA3-E9        | 5'-AAGACAAGCCAATGTGGAGTGA-3'      | 5'-TAAGTATTGTGATTTTAGGAATTGTGC-3'   |
| CTNNA3-E10       | 5'-AAGCAGAAGTTGCAGTCAGTCG-3'      | 5'-ACCAAGAGACTGTATAGGGTTTACTGAT-3'  |
| CTNNA3-E11       | 5'-AATCCCTGACCTCAAGTAATCCAC-3'    | 5'-TTTACTGTTTTTCTATTGTGCGATGAT-3'   |
| CTNNA3-E12       | 5'-CAATGTATGTCAAAAGAAGCAACAC-3'   | 5'-ATTTCCAATGTGCACTCTATCTGA-3'      |
| CTNNA3-E13       | 5'-TTGTTTGTGACAGTAGATCTGACTTTG-3' | 5'-TGAGAAATGATTGTATGGTCCCA-3'       |
| CTNNA3-E14       | 5'-ACCCATTAGAGGCTGCCTAGAT-3'      | 5'-GAAATTGCTGGGTGCATATGGTAAC-3'     |
| CTNNA3-E15       | 5'-TGGCACTTGACACTCAGAGAATC-3'     | 5'-AAGGTGATGCATTACACTAAATTGAT-3'    |
| CTNNA3-E16       | 5'-CTTCCTTATAATCGTCCATTACCTAGT-3' | 5'-ATAGCCGTTCTTTGGGATGC-3'          |
| CTNNA3-E17       | 5'-CGGAGTTCATCTGTACACATTCT-3'     | 5'-ATTGTAATGGTAGAAGCATATCAGAAG-3'   |
| CTNNA3-E18       | 5'-ATTAGGTGCTGACCATACAGAAATG-3'   | 5'-GAGCAGCTTATTGTGACATTAAGACTA-3'   |

**Figure S1. Alignment of Sorbs2 protein sequences from human, mouse and zebrafish**

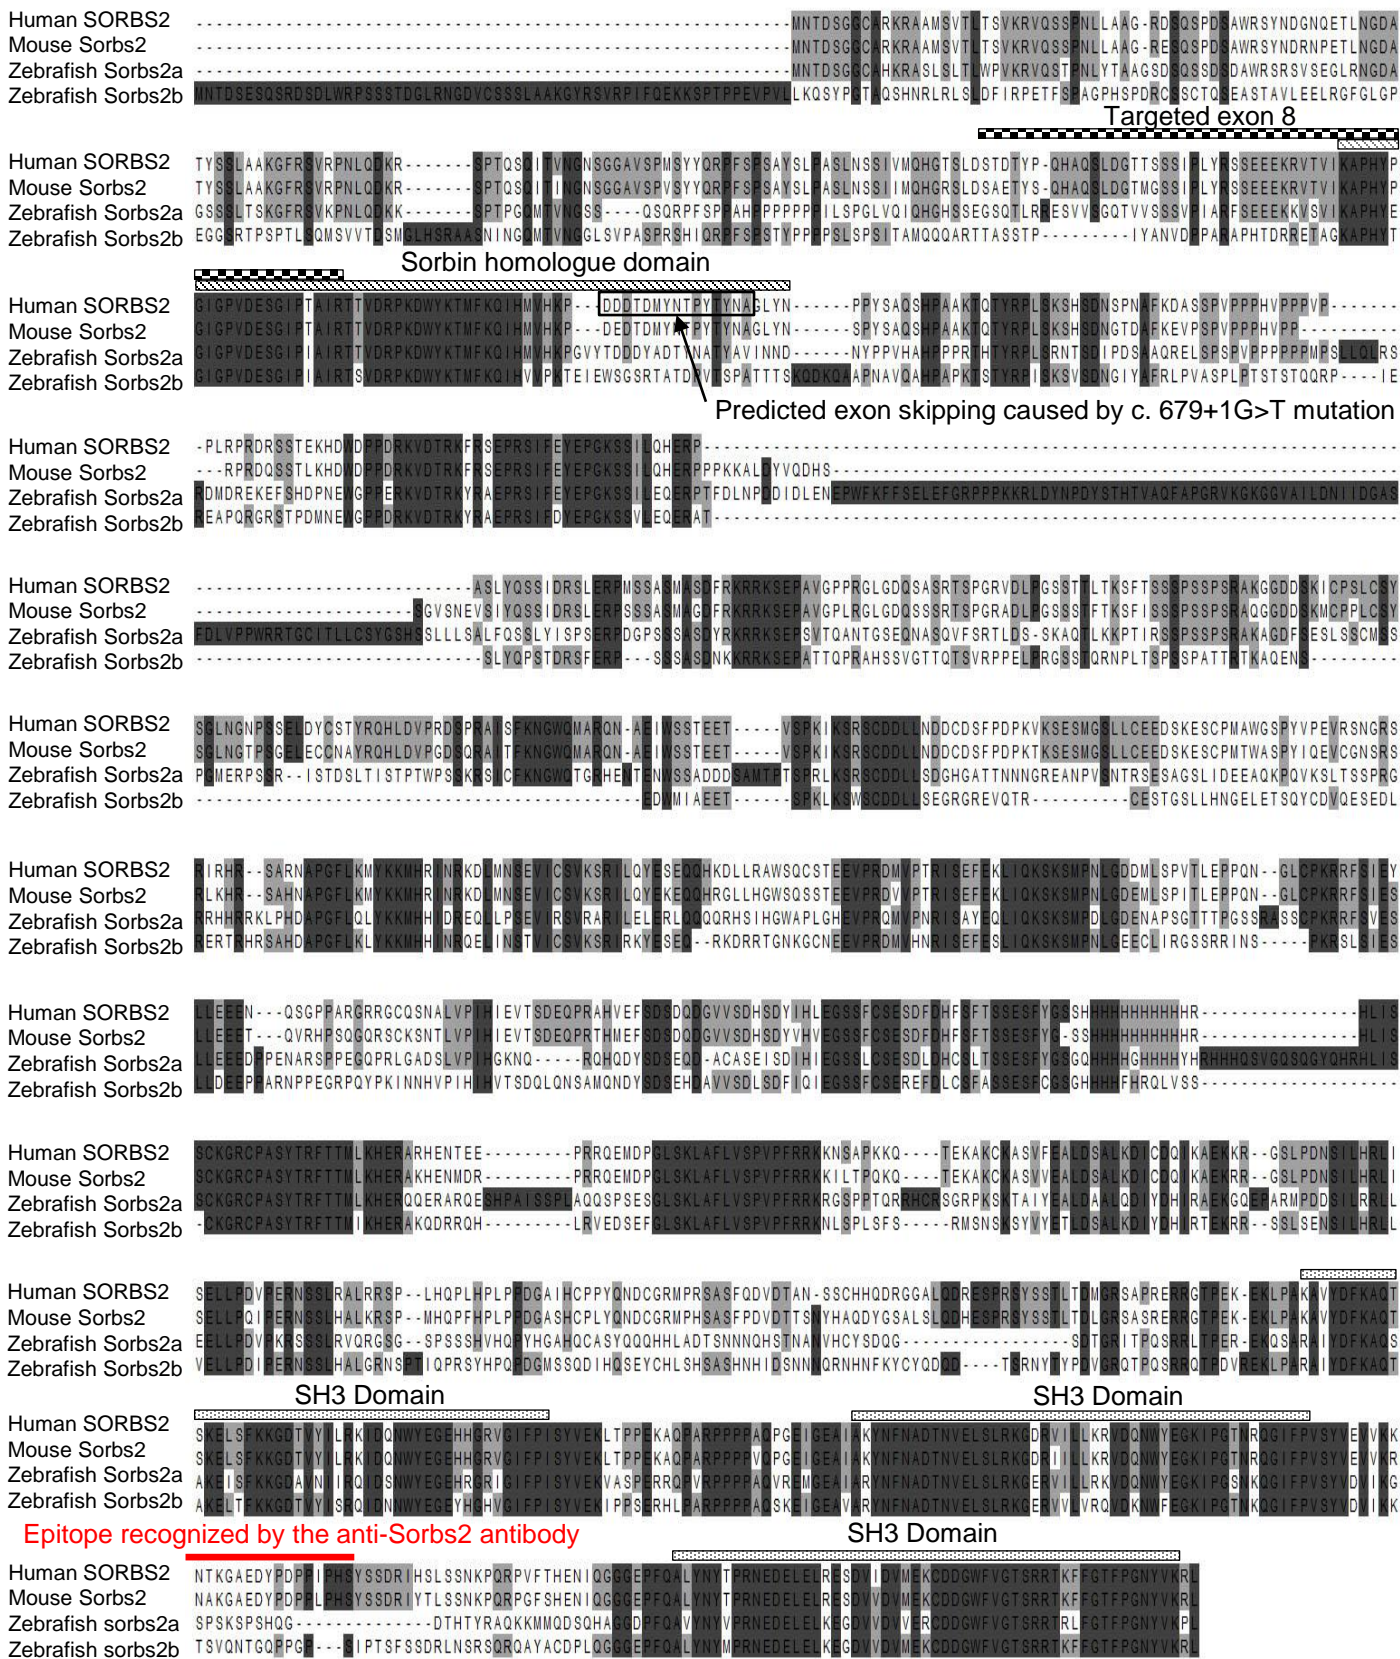

Sequences are more conserved in the N-terminal sorbin homologue domain and the C-terminal SH3 domain among 3 different species. The deletion in *Sorbs2*<sup>es/es</sup> mice removed N terminal sequences containing part of the sorbin homologue domain. The 15 amino acids that are encoded by exon 11 and disrupted by 679+1 G>T mutation are enclosed by a black rectangle frame. Epitope region recognized by the anti-Sorbs2 antibody used for Western blot and immunostaining in mouse tissues is indicated by a red solid line.

**Figure S2. Targeted depletion of the exon 8 in the *Sorbs2*<sup>e8/e8</sup> mice**

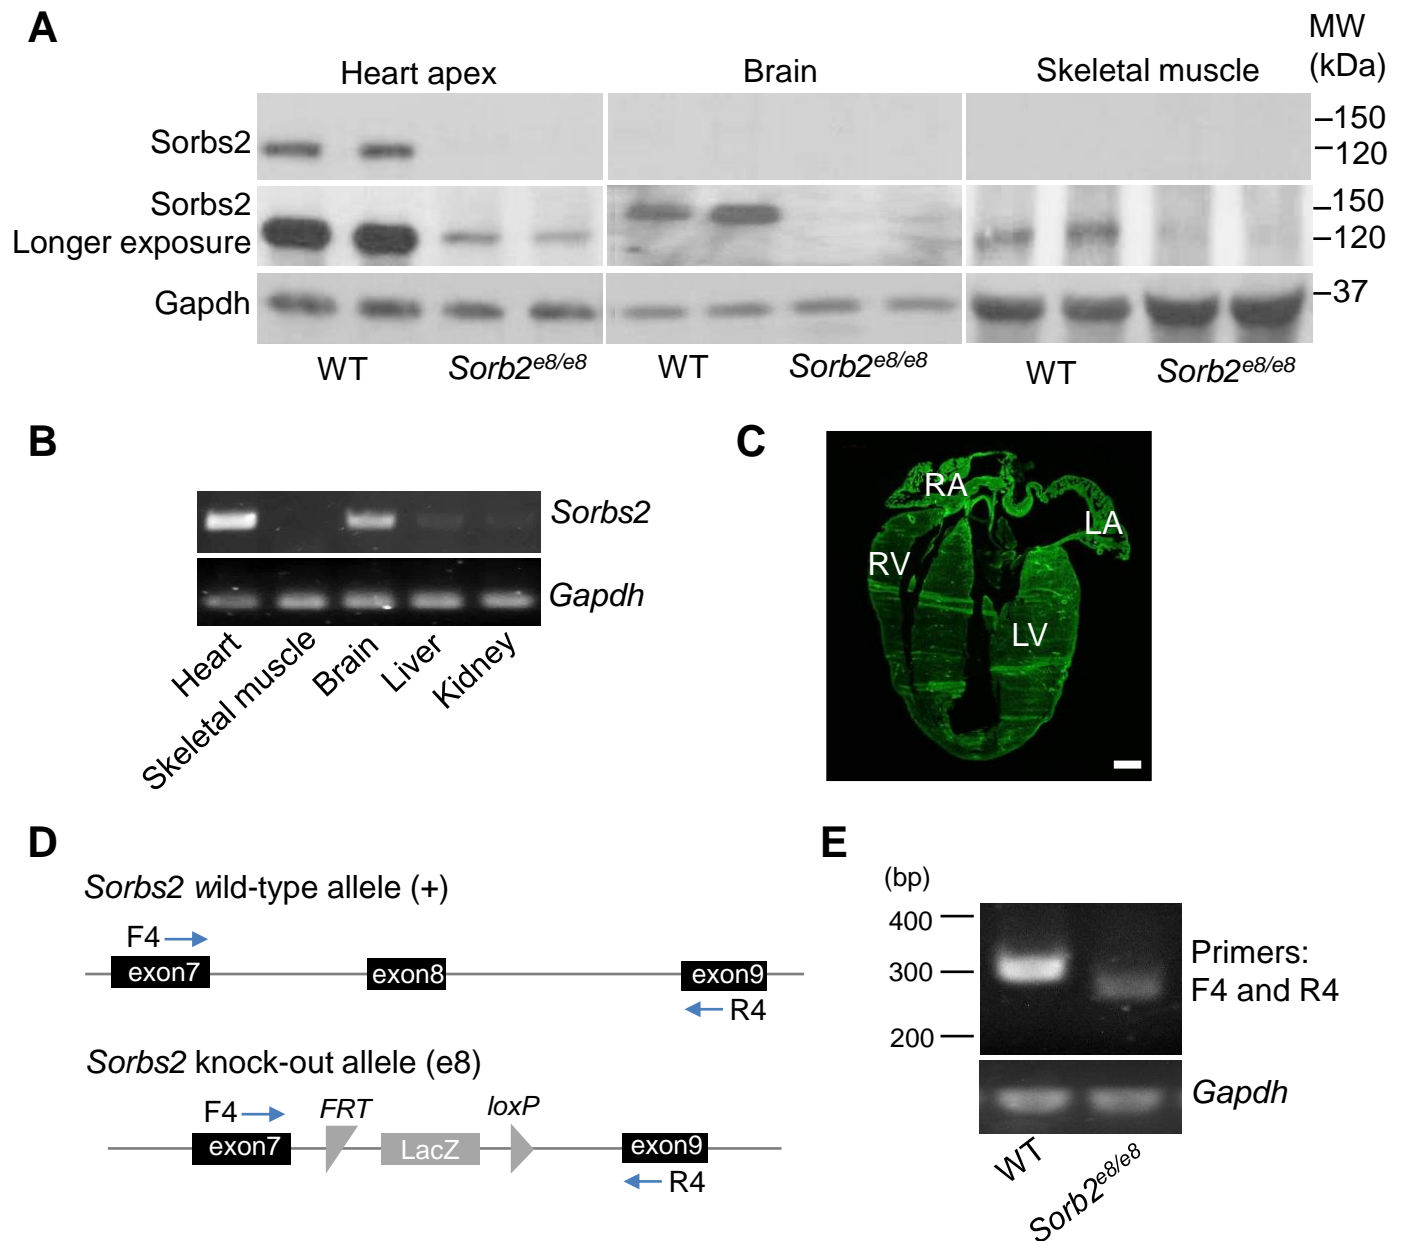

**A**, Western blotting analysis of *Sorbs2* protein expression in the heart, brain and skeletal muscle of *Sorbs2*<sup>e8/e8</sup> and WT control mice. **B**, RT-PCR analysis of the *Sorbs2* transcript expression in different mice tissues. **C**, Shown are immunostaining of mice heart sections using an anti-*Sorbs2* antibody. *Sorbs2* is ubiquitously expressed in 4 cardiac chambers and septum. Scale bar: 50  $\mu$ m. **D**, Schematic design of primers for RT-PCR to analyze the targeted deletion of exon 8 in the *Sorbs2*<sup>e8/e8</sup> mice. **E**, Shown are representative DNA gel images of RT-PCR to confirm the replacement of exon 8 with LacZ that leads to frameshift of *Sorbs2* transcript in the *Sorbs2*<sup>e8/e8</sup> mice.



**Figure S3. Myocardial expression of *sorbs2b* conveys the modifying effects of *GBT002*<sup>-/-</sup> on doxorubicin-induced cardiomyopathy (DIC) in zebrafish**

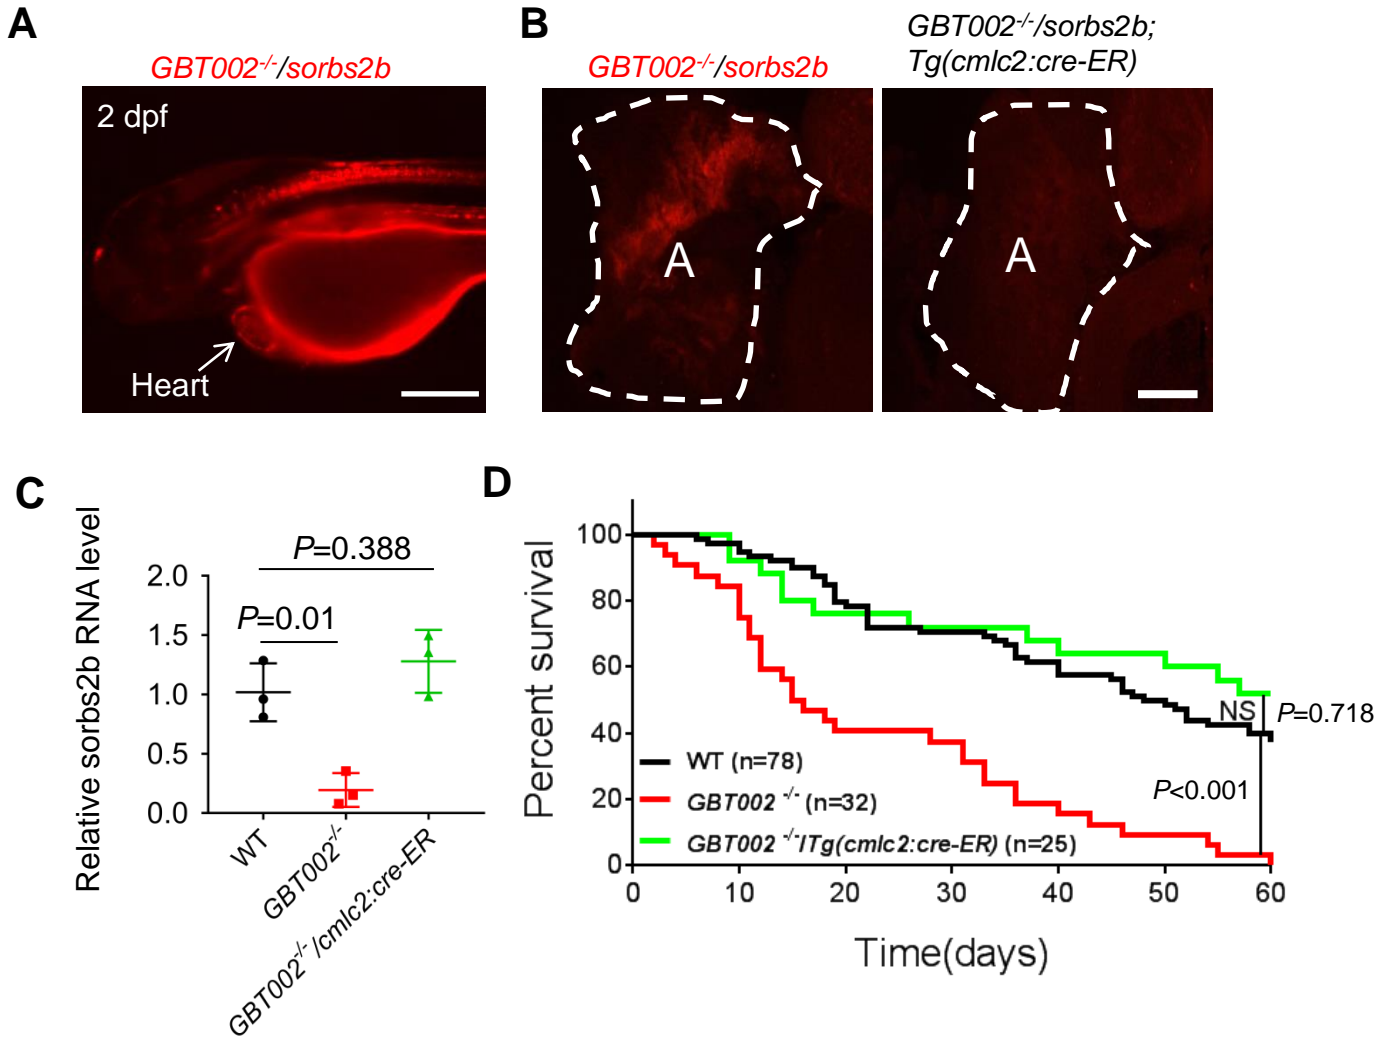

**A**, Heart enriched expression of red fluorescent protein (RFP) reporter in the *GBT002/sorbs2b* mutant at 2 days post-fertilization (dpf). Scale bar, 200  $\mu$ m. **B**, RFP expression in the *GBT002*<sup>-/-</sup> mutant heart, representing an RP2 insertion in the *sorbs2b* locus, was effectively excised in the *GBT002*<sup>-/-</sup>; *Tg(cmlc2:cre-ER)* double fish after hydroxytamoxifen treatment. Scale bar: 200  $\mu$ m. **C**, Quantitative RT-PCR results show that normal *sorbs2b* RNA is dramatically reduced in *GBT002*<sup>-/-</sup> fish compared to WT, but was largely restored in the *GBT002*<sup>-/-</sup>; *Tg(cmlc2:cre-ER)* double fish heart. N=3. \* :  $p<0.05$ . NS, not significant. One-way ANOVA. **D**, The survival rate is significantly lower in *GBT002*<sup>-/-</sup> mutant compared to WT fish after doxorubicin injection (20  $\mu$ g/g), which was largely rescued in the *GBT002*<sup>-/-</sup>; *Tg(cmlc2:cre-ER)* double fish. N=25-78. NS, not significant. Log rank test.

**Figure S4. Elevated expression of molecular markers for heart failure in the *Sorbs2<sup>e8/e8</sup>* mice**

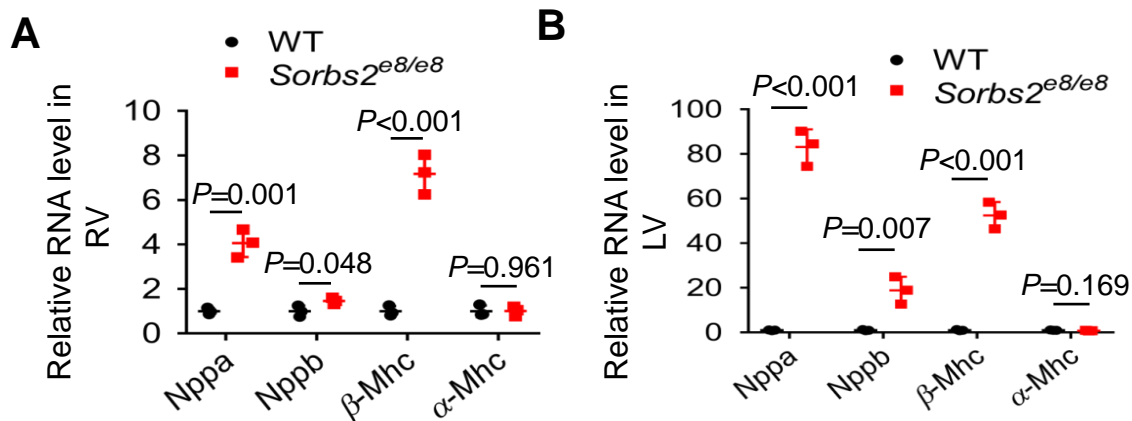

**A-B**, Quantitative RT-PCR analysis of heart failure markers in the RV (A) and LV (B) of the hearts of *Sorbs2<sup>e8/e8</sup>* mice compared to WT. RV, right ventricle. LV, left ventricle. N=3. Unpaired two-tailed Student's *t*-test.

**Figure S5. Representative Immunostaining images of ICD proteins in the *Sorbs2*<sup>e8/e8</sup> and WT control mice mouse hearts**

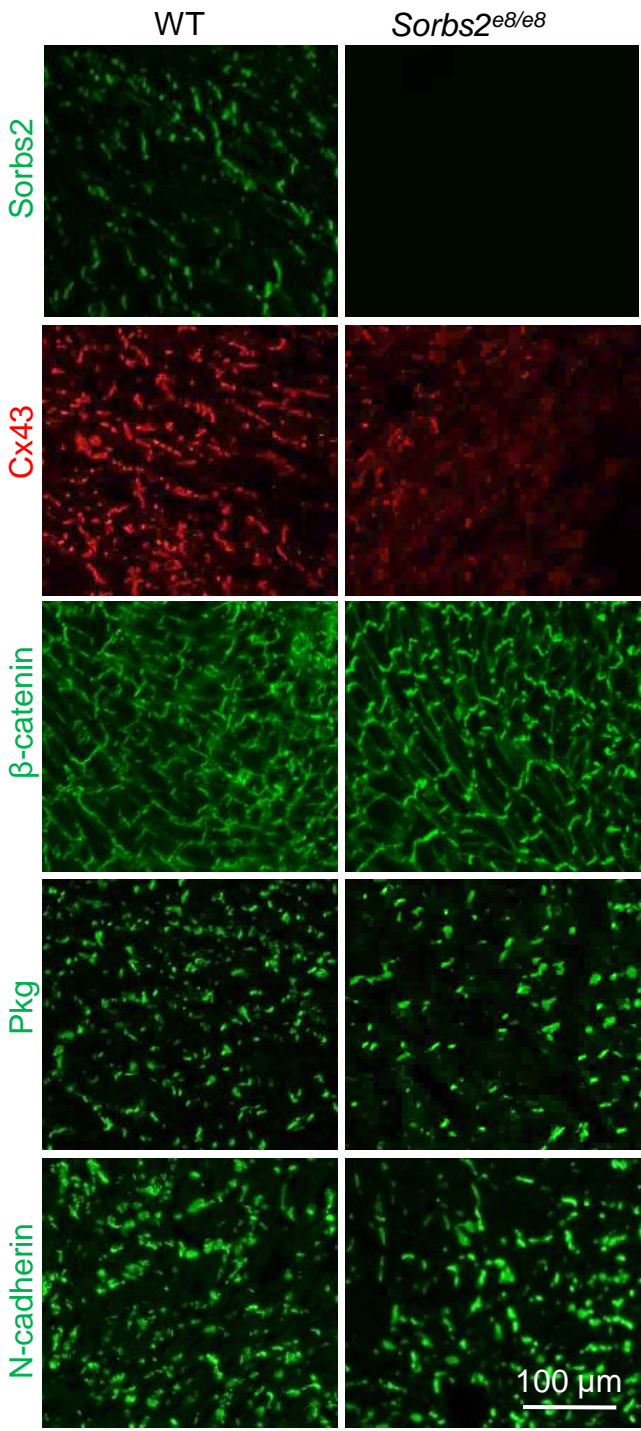

**Figure S6. Altered expression patterns of N-cadherin in the *Sorbs2*<sup>e8/e8</sup> mice**

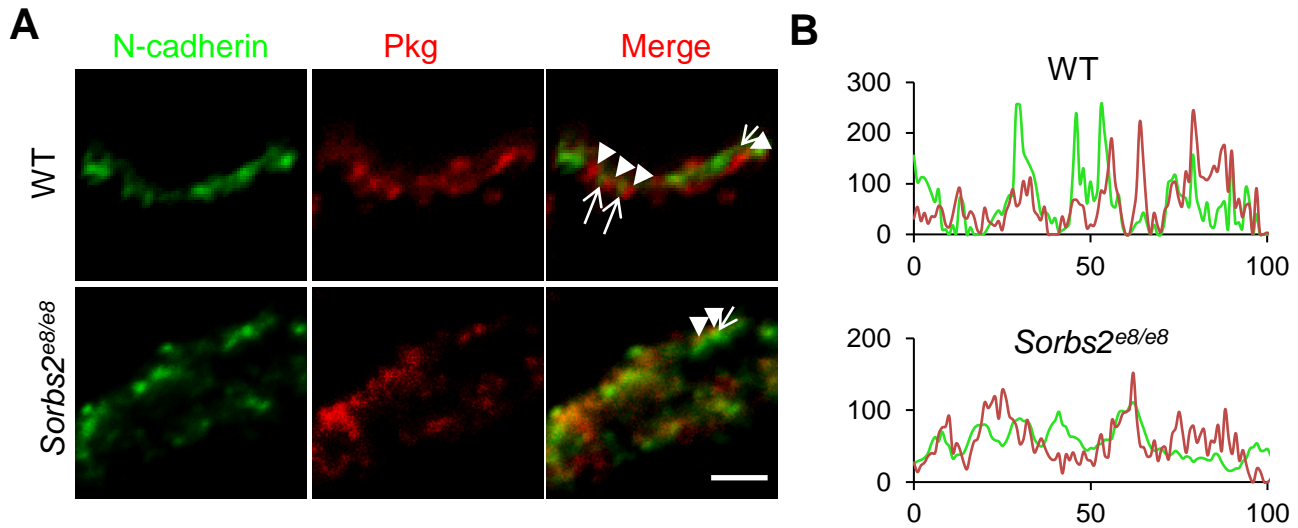

**A**, Shown are images of mouse hearts after immunostaining using anti-N-cadherin antibodies (green, indicated by arrows) and anti-Pkg (red, indicated by arrow heads). The alternating expression pattern of Pkg and N-cadherin protein expression in WT mice is disturbed in *Sorbs2*<sup>e8/e8</sup> mice along ICD. Scale bar: 2  $\mu$ m. LV: left ventricle, RV: right ventricle. **B**, Pseudo line analysis of images in **A**.

**Figure S7. Identifications of *SORBS2* and other known ACM variants in a cohort of 59 ACM patients**

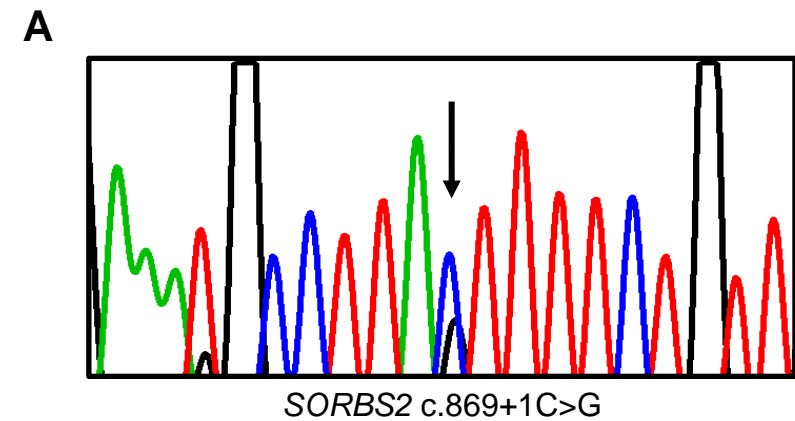

**B**

| No. | Gene          | Official Full Name                              | Chr. | CDS<br>n | Amplicons<br>n | Target<br>bp | Coverage<br>% |
|-----|---------------|-------------------------------------------------|------|----------|----------------|--------------|---------------|
| 1   | <i>DES</i>    | Desmin                                          | 2    | 9        | 17             | 1512         | 100           |
| 2   | <i>DSC2</i>   | Desmocollin 2                                   | 18   | 17       | 31             | 2606         | 89.0          |
| 3   | <i>DSG2</i>   | Desmoglein 2                                    | 18   | 15       | 36             | 3420         | 97.1          |
| 4   | <i>DSP</i>    | Desmoplakin                                     | 6    | 25       | 74             | 9364         | 99.7          |
| 5   | <i>JUP</i>    | Junction Plakoglobin                            | 17   | 13       | 22             | 2381         | 100           |
| 6   | <i>LMNA</i>   | Lamin A/C                                       | 1    | 13       | 23             | 2249         | 100           |
| 7   | <i>PKP2</i>   | Plakophilin 2                                   | 12   | 14       | 28             | 2640         | 94.3          |
| 8   | <i>PLN</i>    | Phospholamban                                   | 6    | 1        | 10             | 1139         | 75.8          |
| 9   | <i>RYR2</i>   | Ryanodine Receptor 2                            | 1    | 105      | 165            | 14830        | 99.5          |
| 10  | <i>SCN5A</i>  | Sodium Voltage-Gated Channel<br>Alpha Subunit 5 | 3    | 30       | 62             | 6807         | 100           |
| 11  | <i>TGFB3</i>  | Transforming Growth Factor Beta 3               | 14   | 7        | 11             | 1316         | 100           |
| 12  | <i>TMEM43</i> | Transmembrane Protein 43                        | 3    | 12       | 16             | 1335         | 100           |
| 13  | <i>TTN</i>    | Titin                                           | 2    | 315      | 947            | 109511       | 99.1          |

**A**, Chromatogram illustrates c.869+1C>G mutation identified in the *SORBS2* gene from an ACM patient. **B**, List of an ACM gene panel that consists of 13 genes was sequenced by targeted sequencing.

**Figure S8. Schematic illustration of corresponding exons among human *SORBS2* and its zebrafish orthologs *sorbs2a* and *sorbs2b* gene**

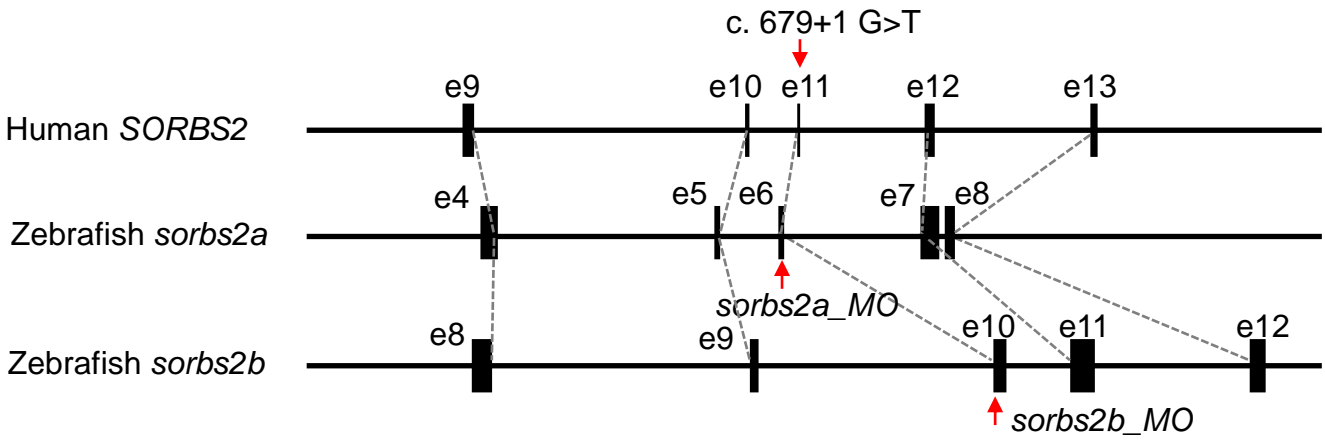

The c.679+1G>T mutation is located in the exon 11 of *SORBS2* in human, corresponding to the exon 6 in *sorbs2a* and the exon 10 in *sorbs2b* gene in zebrafish.
